# Supplementary material for: Purpose-Designed Hydrogeological Maps for Wide Interconnected Surface–Groundwater Systems: The Test Example of Parma Alluvial Aquifer and Taro River Basin (Northern Italy)
Source: MDPI journal article supplement (doi:10.3390/hydrology10060127), 2023-06-04

Hydrogeological Map of the Interconnected Surface-Groundwater System  
of Parma Alluvial Aquifer and Taro River Basin

Riccardo Pinardi<sup>(1)</sup>, Alessandra Feo<sup>(1)</sup>, Andrea Ruffini<sup>(2)</sup> and Fulvio Celico<sup>(1)</sup>  
<sup>(1)</sup>Dipartimento di Scienze Chimiche, della Vita e della Sostenibilità Ambientale, Università degli Studi di Parma, 43124 Parma, Italy; <sup>(2)</sup>Servizio di Pianificazione Territoriale, Provincia di Parma, 43123 Parma, Italy;

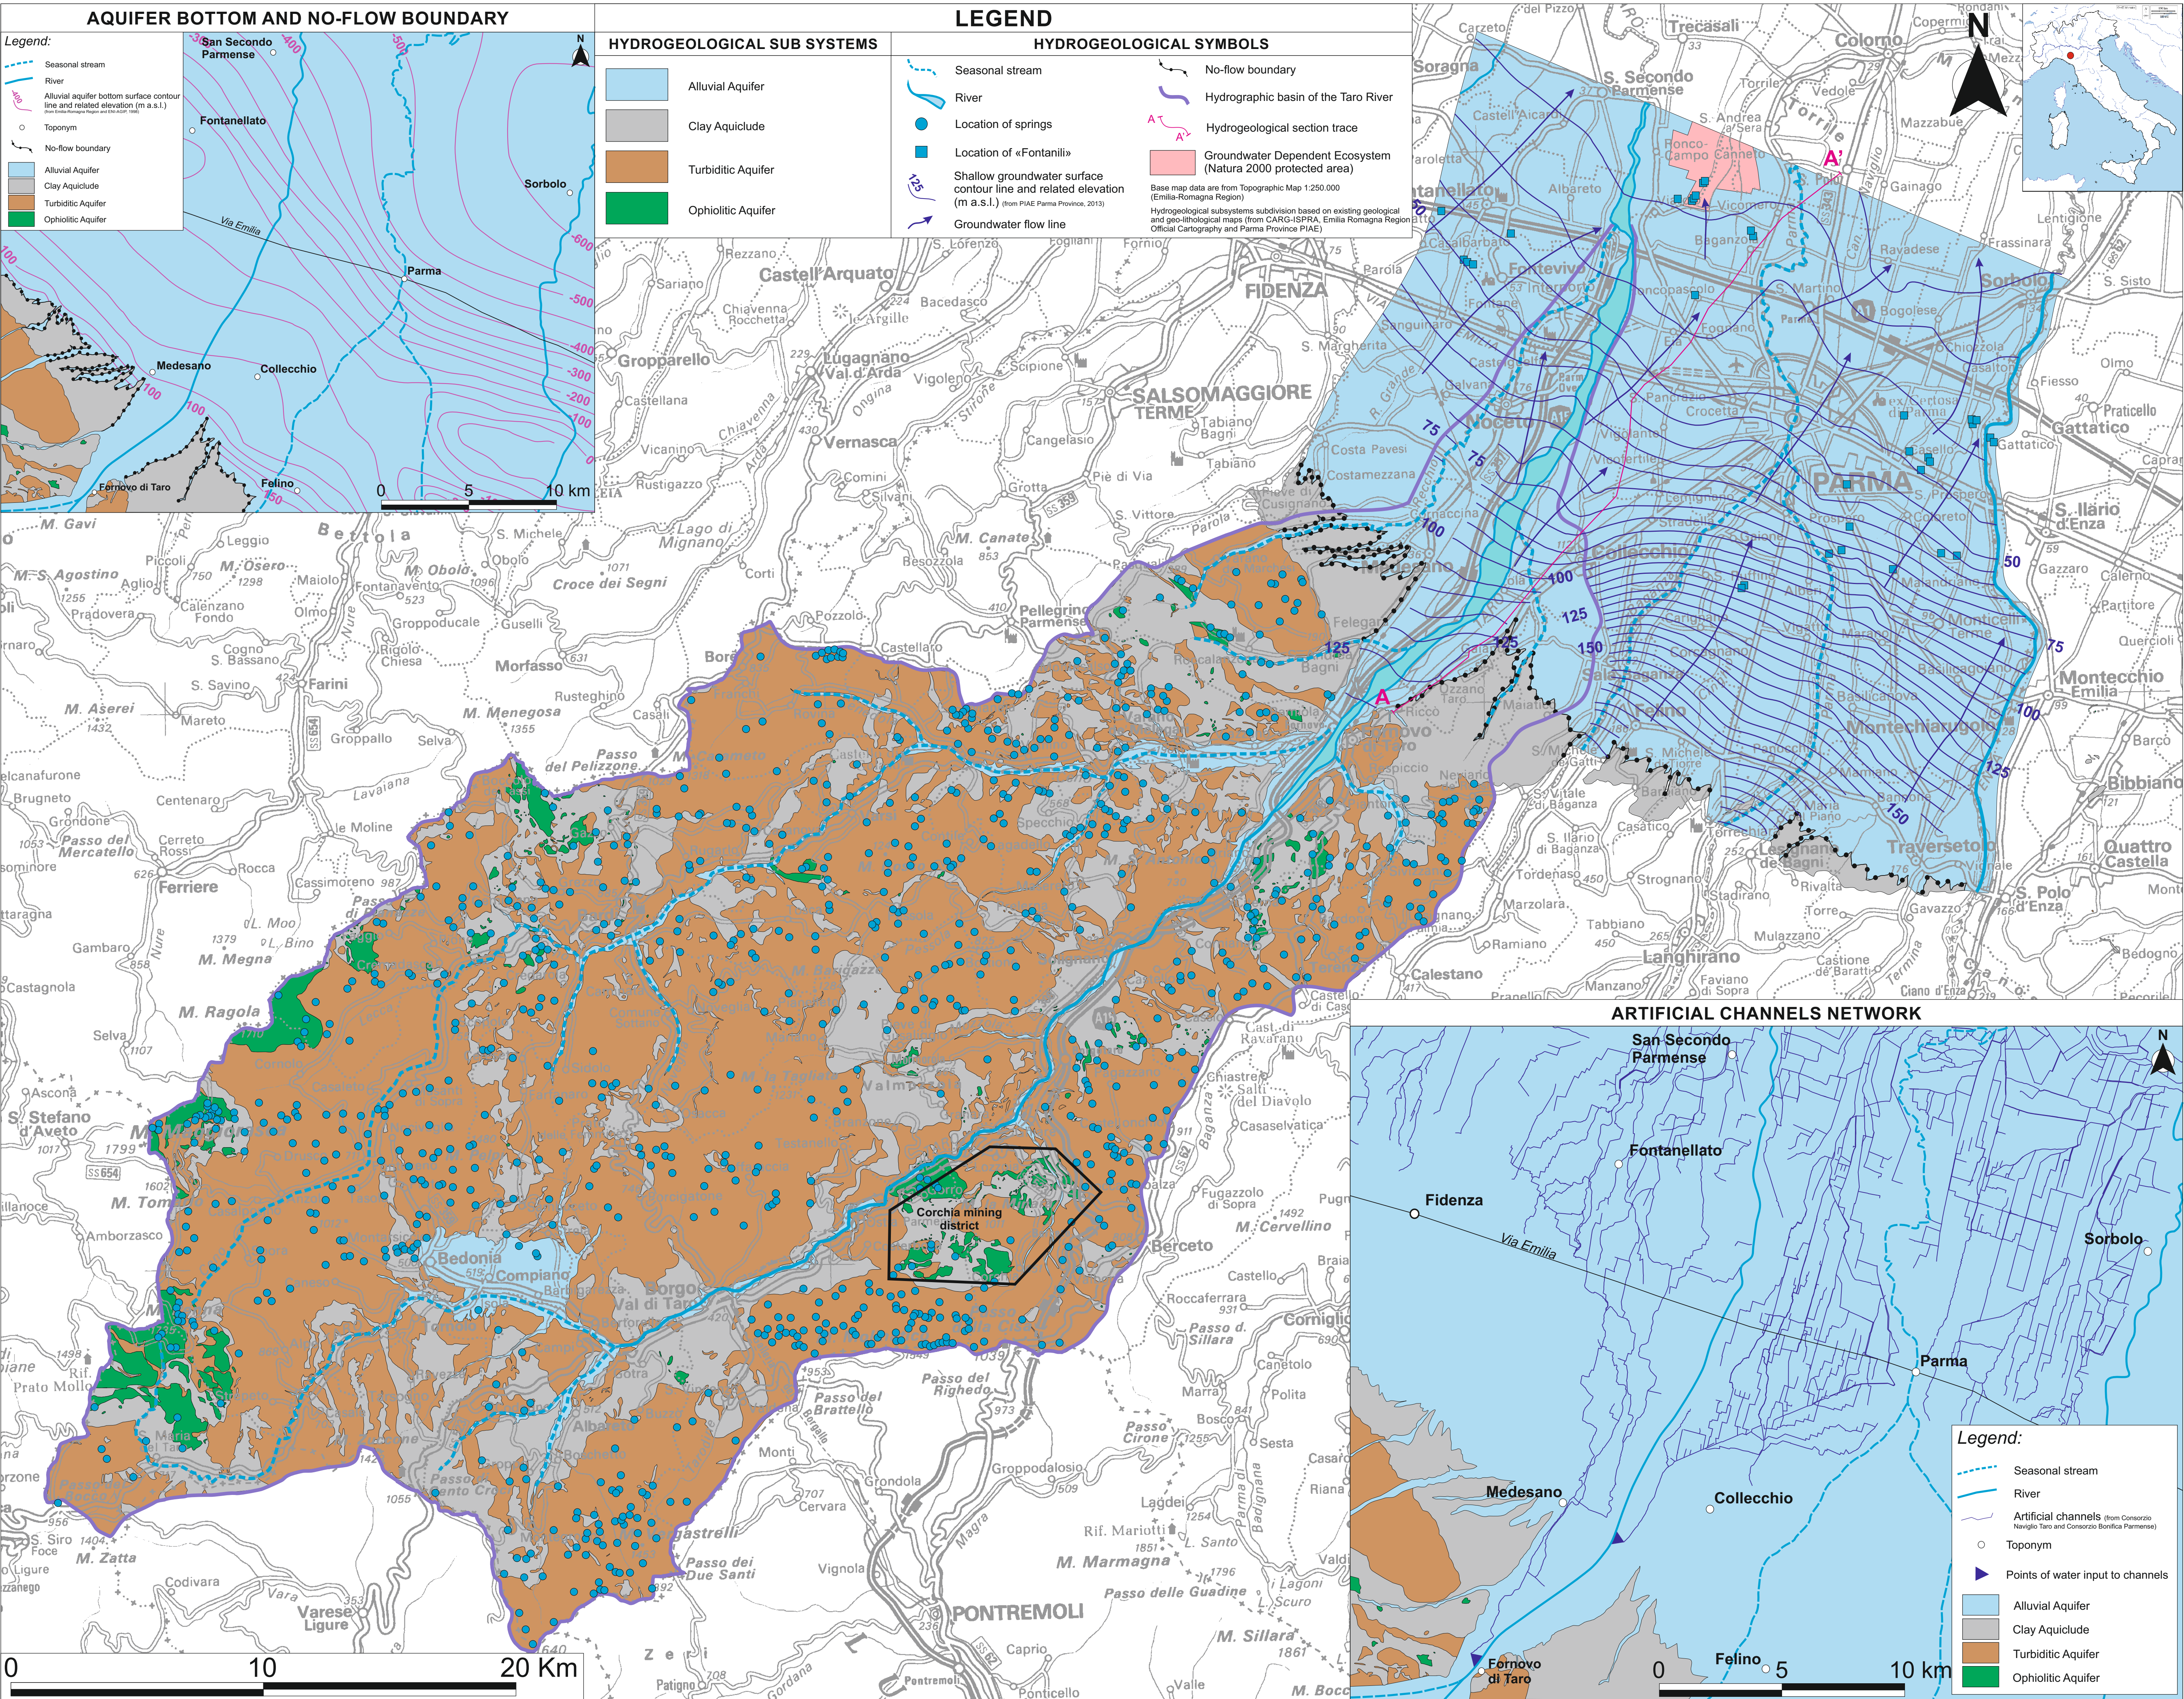

HYDROGEOLOGICAL SECTION

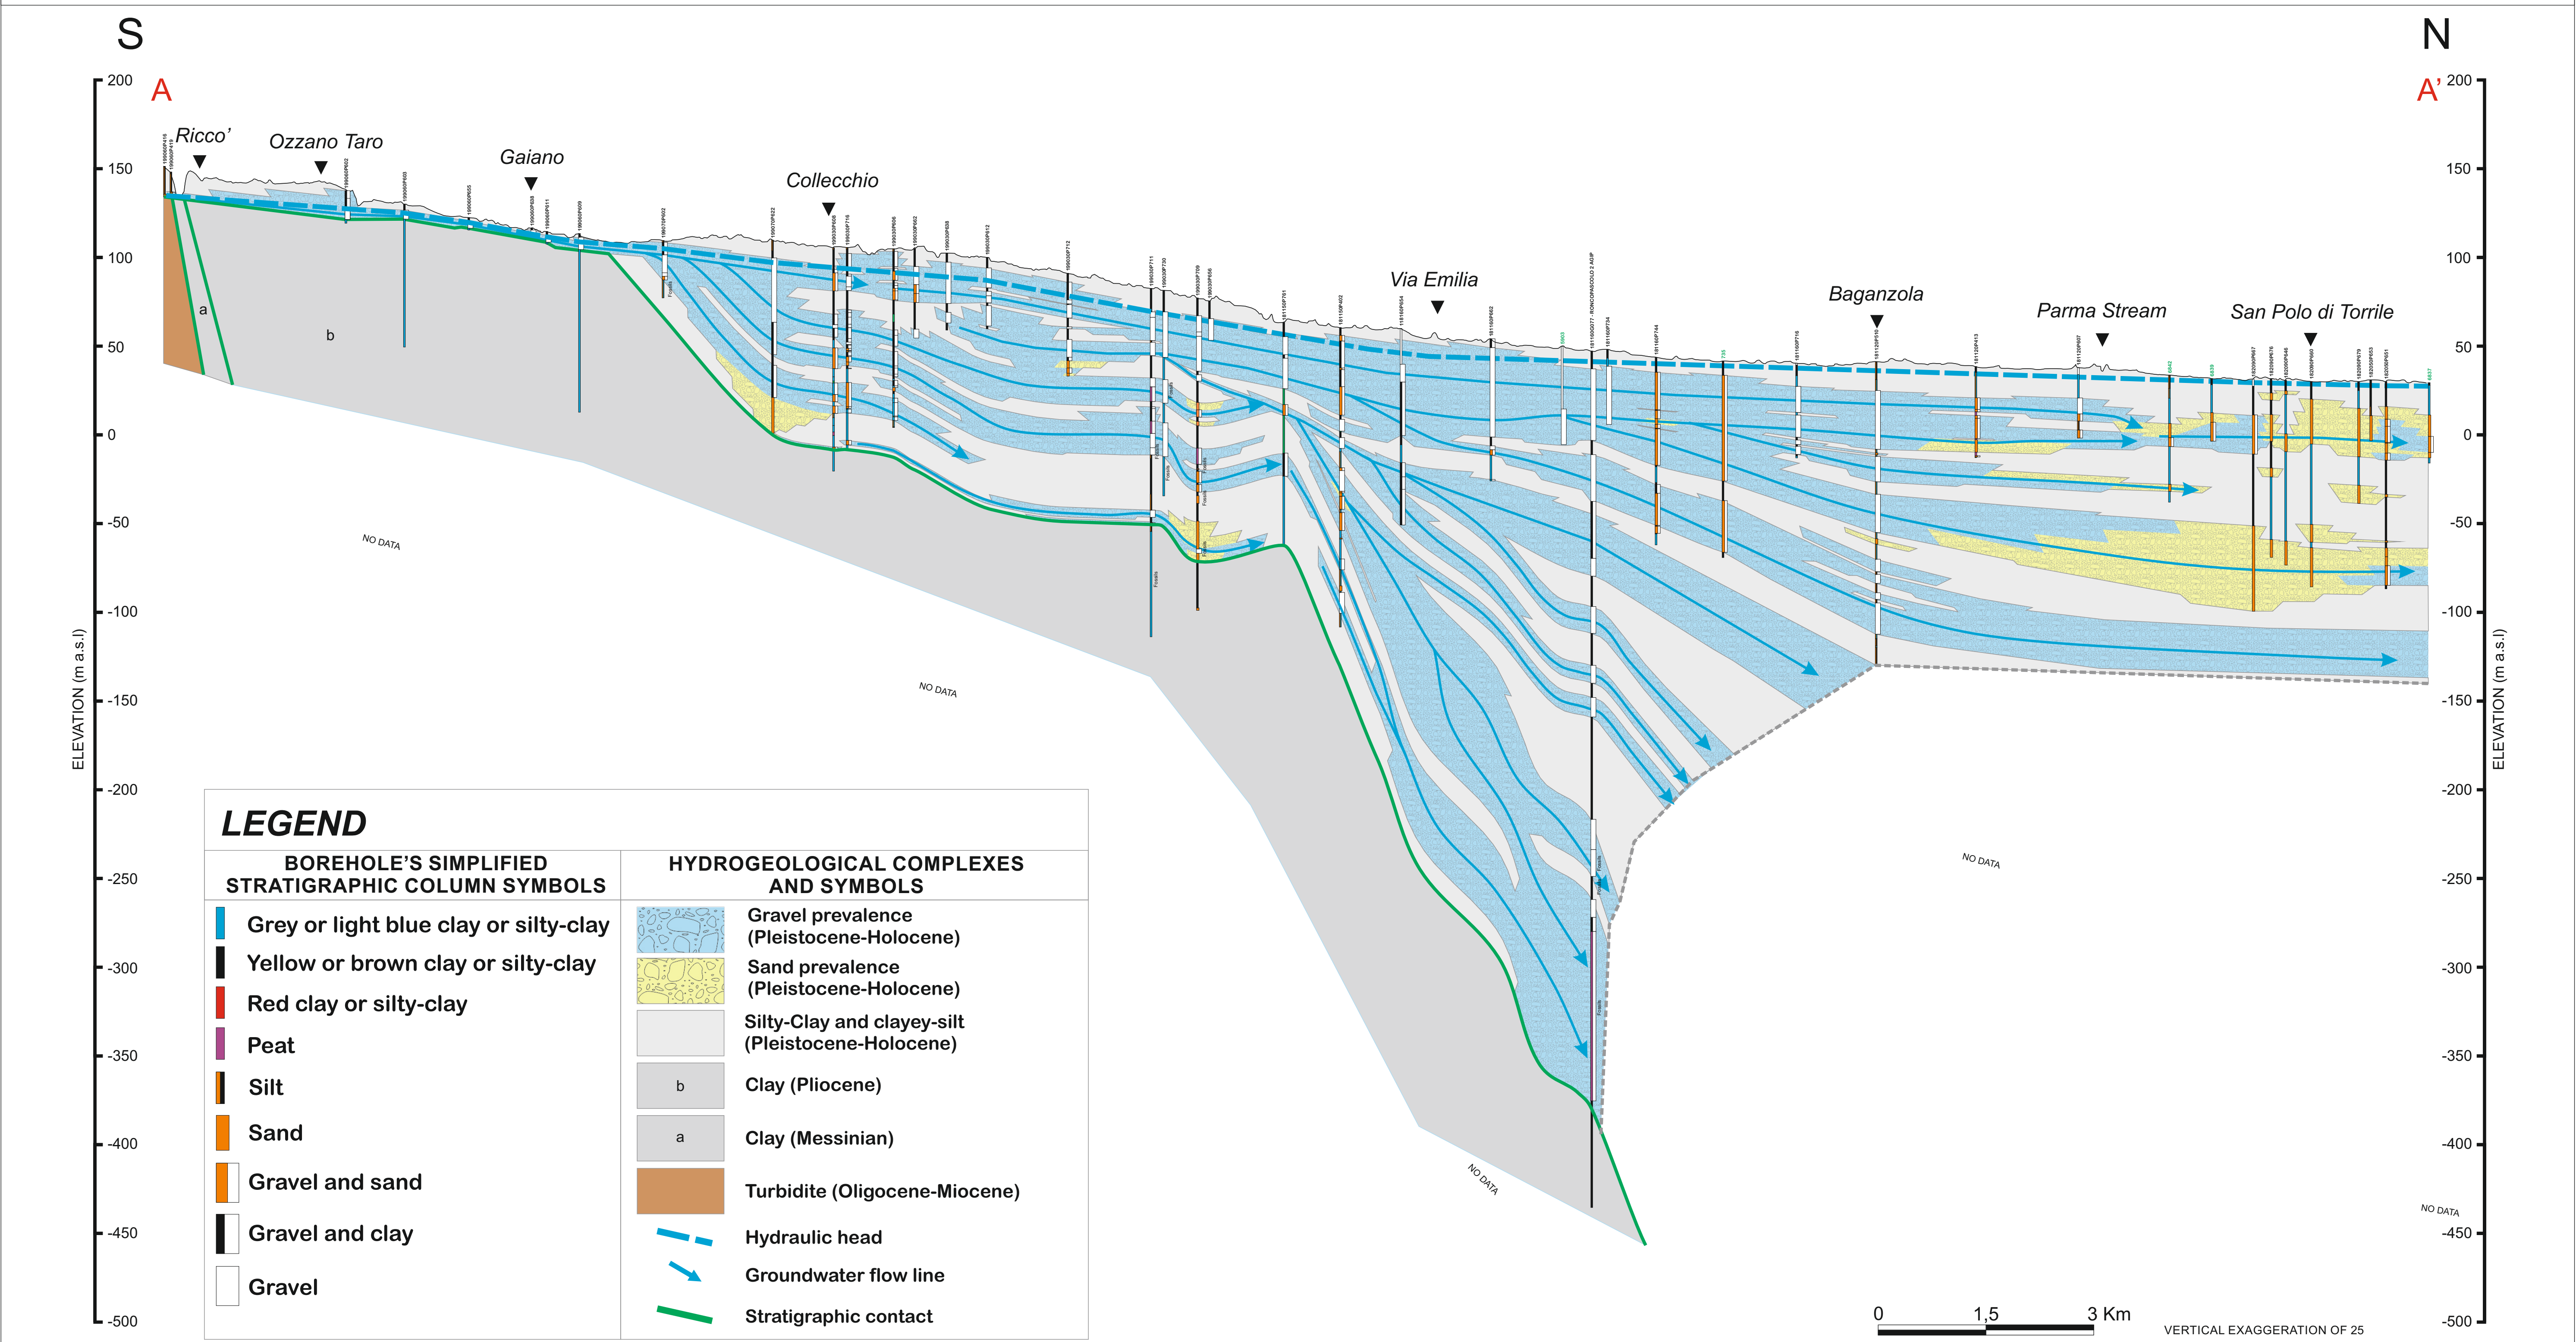

Supplement: s1 [file s1]
